# Supplementary material for: Omics-driven identification and elimination of valerolactam catabolism in Pseudomonas putida KT2440 for increased product titer
Source: PubMed Central journal article supplement — Metab Eng Commun. 2019 Aug 10;9:e00098. doi: 10.1016/j.mec.2019.e00098 (PMC6838509; doi:10.1016/j.mec.2019.e00098), 2019-08-10
Supplement: mmc1.pdf [file mmc1.pdf]

Omics-driven identification and elimination of valerolactam catabolism in *Pseudomonas putida* KT2440 for increased product titer

Mitchell G. Thompson<sup>1,2,3</sup>, Luis E. Valencia<sup>1,2,4</sup>, Jacquelyn M. Blake-Hedges<sup>1,2,5</sup>, Pablo Cruz-Morales<sup>1,2,6</sup>, Alexandria E. Velasquez<sup>1,2</sup>, Allison N. Pearson<sup>1,2</sup>, Lauren N. Sermeno<sup>1,2</sup>, William A. Sharpless<sup>1,2</sup>, Veronica T. Benites<sup>1,2</sup>, Yan Chen<sup>1,2</sup>, Edward E. K. Baidoo<sup>1,2</sup>, Christopher J. Petzold<sup>1,2</sup>, Adam M. Deutschbauer<sup>3,7</sup>, Jay D. Keasling<sup>1,2,4,8,9,10</sup>

<sup>1</sup>Joint BioEnergy Institute, 5885 Hollis Street, Emeryville, CA 94608, USA.

<sup>2</sup>Biological Systems & Engineering Division, Lawrence Berkeley National Laboratory, Berkeley, CA 94720, USA.

<sup>3</sup>Department of Plant and Microbial Biology, University of California, Berkeley, CA 94720, USA

<sup>4</sup>Joint Program in Bioengineering, University of California, Berkeley/San Francisco, CA 94720, USA

<sup>5</sup>Department of Chemistry, University of California, Berkeley, CA 94720, USA

<sup>6</sup>Centro de Biotecnología FEMSA, Instituto Tecnológico y de Estudios superiores de Monterrey, Mexico

<sup>7</sup>Environmental Genomics and Systems Biology Division, Lawrence Berkeley National Laboratory, Berkeley, California, USA

<sup>8</sup>Department of Chemical and Biomolecular Engineering, University of California, Berkeley, CA 94720, USA

<sup>9</sup>The Novo Nordisk Foundation Center for Biosustainability, Technical University of Denmark, Denmark

<sup>10</sup>Center for Synthetic Biochemistry, Institute for Synthetic Biology, Shenzhen Institutes for Advanced Technologies, Shenzhen, China

## Supplemental Figures

**Figure S1: Growth of *P. putida* on glucose with various nitrogen sources. Growth of *P. putida* in minimal medium supplemented with either 10 mM glucose, and 10 mM of either caprolactam, valerolactam, NH<sub>4</sub>, or no nitrogen. Shaded area represents the 95% confidence interval (cI), n=3.**

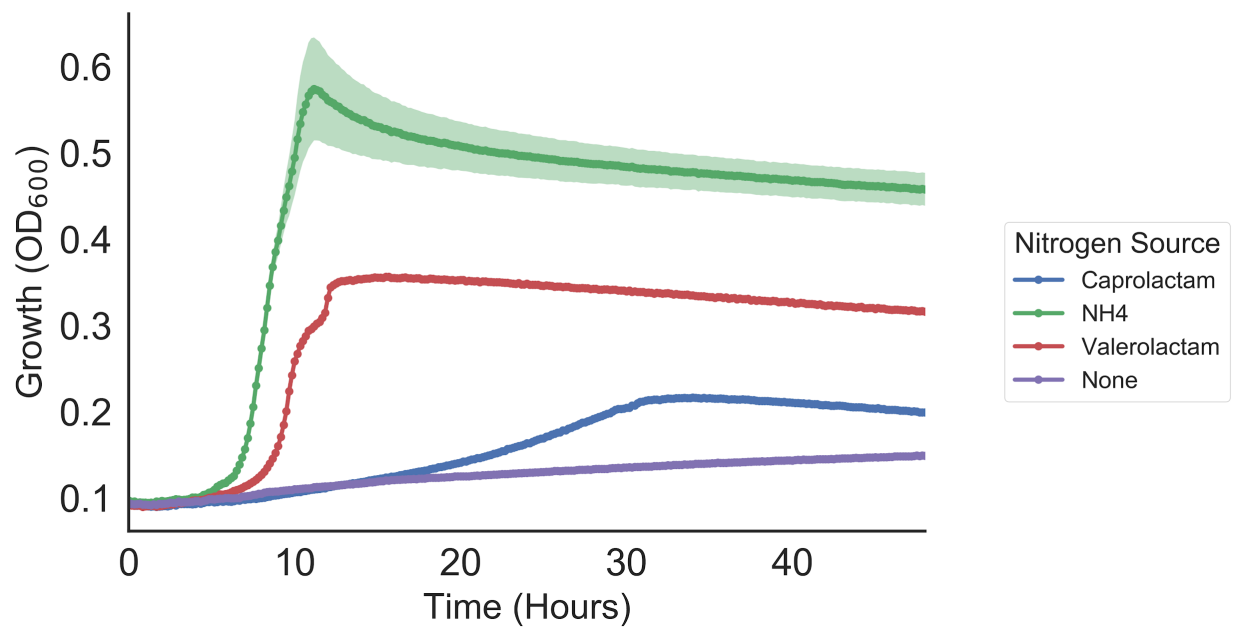

**Figure S2: RB-TnSeq and Cellular Shotgun Proteomics Results. (A) Genes that show significant ( $t < -4$ ) and large (fitness  $< -2$ ) fitness defects specific to either L-lysine, 5AVA, or valerolactam, but not glucose. All non-valerolactam fitness experiments are from Thompson et. al 2019. (B) Fitness of the *oplA* and *oplB* genes on all carbon sources (C) Venn diagram showing the number of specific proteins found in the 100 most abundant proteins found within *P. putida* grown on either glucose, valerolactam, or 5-aminovalerate, based on emPAI. Below we can see the 5 most abundant proteins specific to growth on valerolactam. OplA and OplB are highlighted.**

**A**

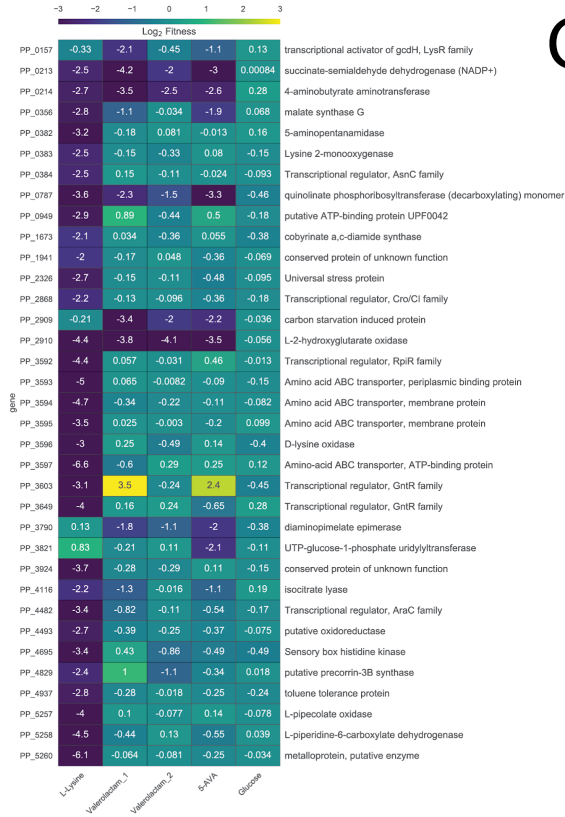

**B**

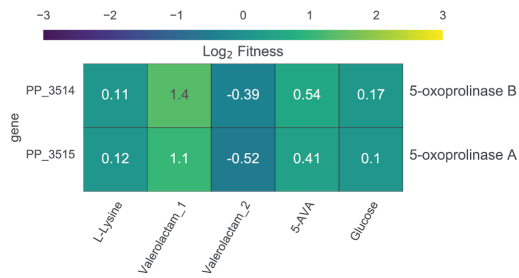

**C**

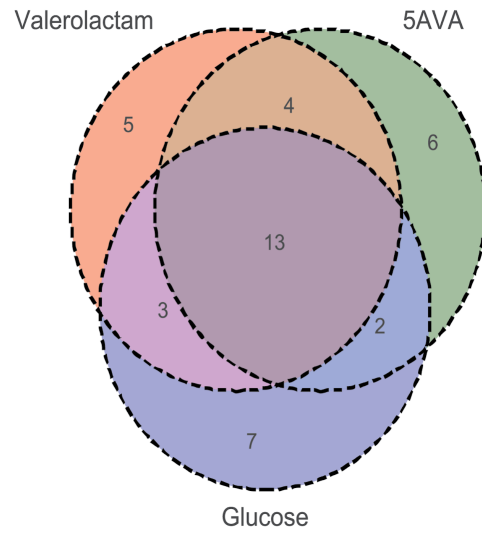

| Carbon_Source | Uniprot      | emPAI | Desc                                      |
|---------------|--------------|-------|-------------------------------------------|
| Valerolactam  | Q88H50_PSEPK | 1.7   | Hydantoin utilization protein A           |
| Valerolactam  | Q88H51_PSEPK | 1.91  | Hydantoin utilization protein B           |
| Valerolactam  | Q88QU0_PSEPK | 1.19  | Uncharacterized protein                   |
| Valerolactam  | Q88NR4_PSEPK | 2.09  | Branched-chain amino acid ABC transporter |
| Valerolactam  | ILVC_PSEPK   | 1.01  | Ketol-acid reductoisomerase               |

**Figure S3: Distribution of OplBA orthologs: Phylogenomics of selected OplBA homologs across bacteria. The boxes represent the gene neighborhood for each homolog. The genes have been colored to represent their annotated functions.**

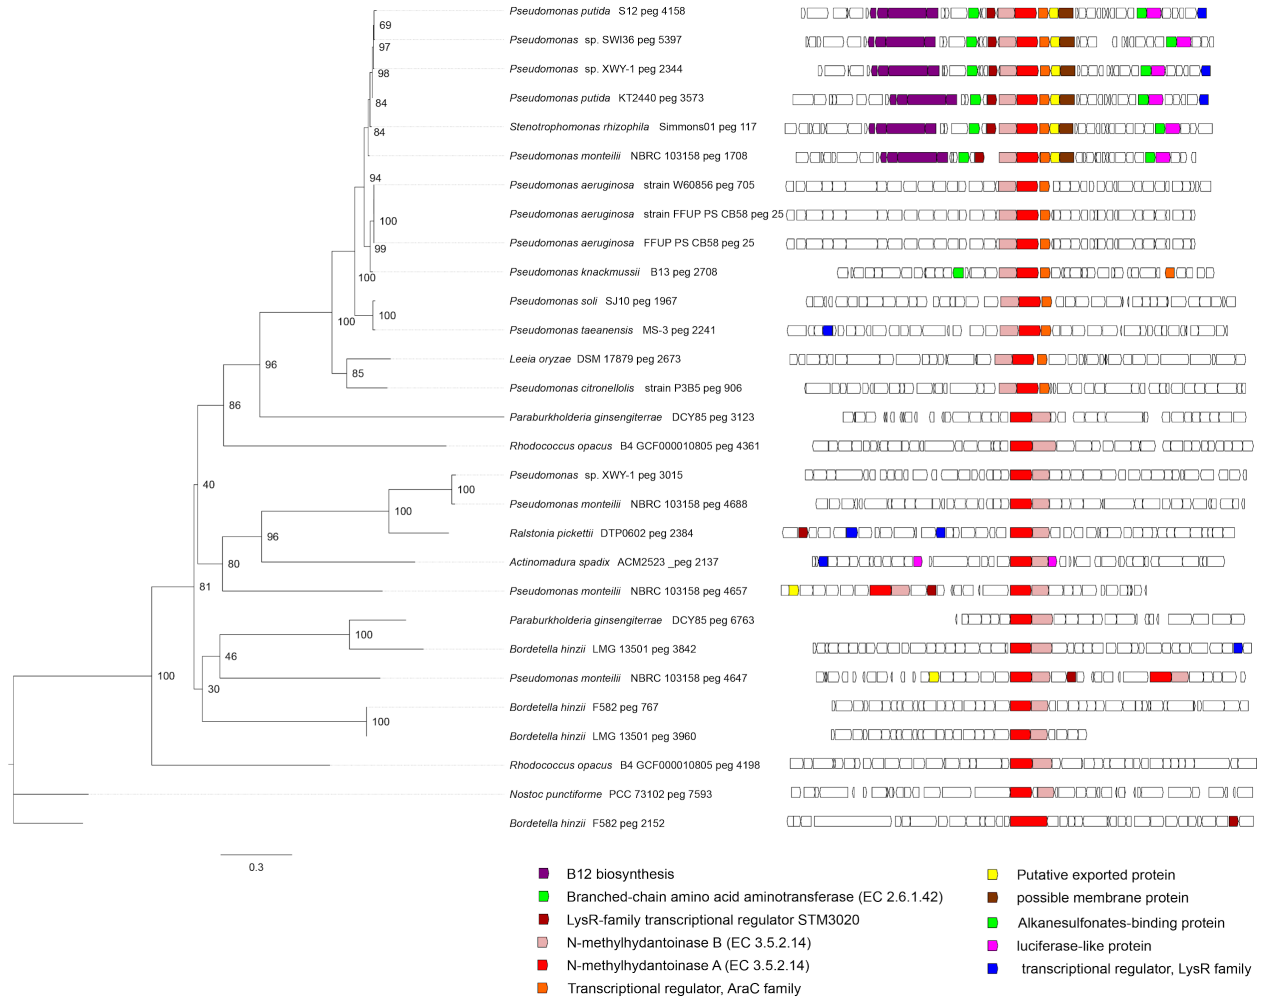

**Figure S4: Complementation of *oplBA* mutants with plasmid expressed genes. *P. putida* *oplBA* mutants harboring either pBADT-RFP (left) or pBADT-*oplBA* (right) were grown in minimal media with 10 mM valerolactam and varying concentrations of arabinose (% w/v) to induce expression from the plasmid. Shaded area represents the 95% confidence interval (cI), n=3.**

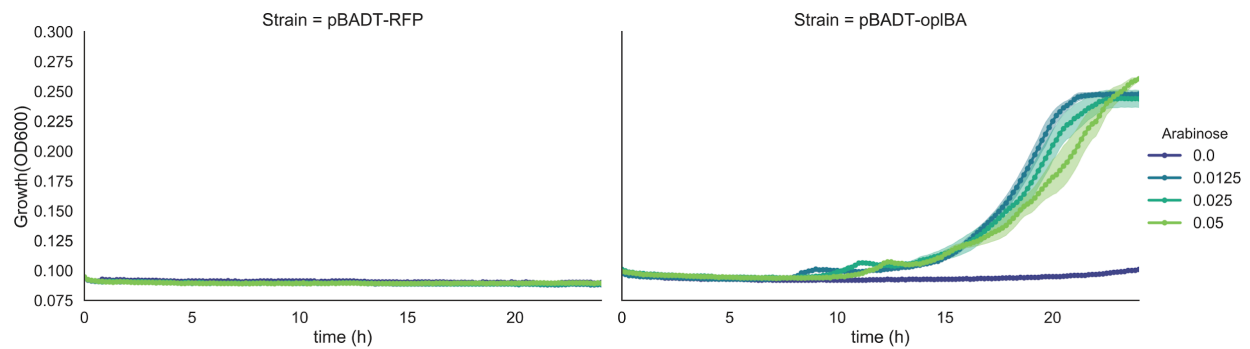

**Figure S5: Biochemical characterization of OplAB.** When purified OplA and OplB were incubated in the presence of valerolactam with or without ATP for 4 hours, there was no significant decrease in lactam concentration compared to boiled enzyme control. Error bars represent 95% cI, n=3.

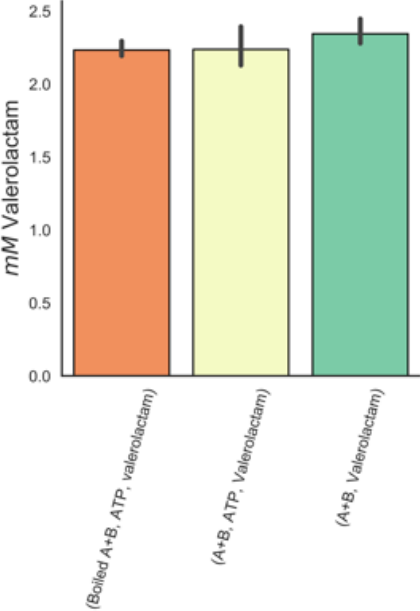

**Table S1: Specific growth rates of *P. putida* and valerolactam catabolic mutants on various carbon sources.**

| <b>Strain</b>  | <b>Carbon Source</b> | <b>Maximal Growth Rate (1/hr)</b> |
|----------------|----------------------|-----------------------------------|
| WT             | 5AVA                 | 0.304339                          |
|                | Glucose              | 0.561722                          |
|                | Valerolactam         | 0.492629                          |
| $\Delta$ davT  | 5AVA                 | 0                                 |
|                | Glucose              | 0.568278                          |
|                | Valerolactam         | 0                                 |
| $\Delta$ oplBA | 5AVA                 | 0.283833                          |
|                | Glucose              | 0.567119                          |
|                | Valerolactam         | 0                                 |
